# Supplementary material
Source: publisher figshare collection journal article supplement (https://gsapubs.figshare.com/ndownloader/files/25481567)
Supplement: Supplementary file 1 [file 25481567]

## Sheet: G47986
Beaty, B.J., and Planavsky, N.J., 2020, A 3 b.y. record of a biotic influence on terrestrial weathering: Geology, v. 49, https://doi.org/10.1130/G47986.1

## Sheet: Box and whisker
Basal Pongola		Denny Dalton		Lake Voronye		Mt. Roe #2		Black Reef		Saganaga		Lauzon Bay		Pronto		Denison		Quirke II		Cooper Lake		Ville Marie		Hekpoort		Beaverlodge Lake		Flin Flon		Baraboo		Avontuur		Drakenstein		Temperance River		Sigula		Roded		Timna		Verde River		Elk Point		St. Francois Mtns
ΔAl/Ti	Expected	ΔAl/Ti	Expected	ΔAl/Ti	Expected	ΔAl/Ti	Expected	ΔAl/Ti	Expected	ΔAl/Ti	Expected	ΔAl/Ti	Expected	ΔAl/Ti	Expected	ΔAl/Ti	Expected	ΔAl/Ti	Expected	ΔAl/Ti	Expected	ΔAl/Ti	Expected	ΔAl/Ti	Expected	ΔAl/Ti	Expected	ΔAl/Ti	Expected	ΔAl/Ti	Expected	ΔAl/Ti	Expected	ΔAl/Ti	Expected	ΔAl/Ti	Expected	ΔAl/Ti	Expected	ΔAl/Ti	Expected	ΔAl/Ti	Expected	ΔAl/Ti	Expected	ΔAl/Ti	Expected	ΔAl/Ti	Expected
0.168824	-0.00751061	-0.764601	-0.00501955	-0.318053	0.00164505	0.0601124	-0.00508367	1.36765	-0.00974257	-0.376592	-0.0109524	-0.420622	0.0126777	-0.0105499	-0.00118081	-0.260396	-0.00410409	-0.0347249	-0.00455216	-0.0507389	-0.00195242	0.236795	-0.00453338	0.264881	-0.00399814	0.0647823	-0.0065779	-0.527235	-0.0100522	-0.029703	-0.012707	-0.0466238	-0.00342611	-0.0844766	-4.34106e-05	-0.467167	-1.30903e-05	0.132779	-4.50791e-05	-0.832108	0.0630975	-0.867376	-0.00846805	0.022599	-5.04491e-05	0.410834	-2.33053e-05	0.216575	9.68166e-05
-0.0617247	-0.00110583	-0.796313	-0.00499156	-0.184535	0.00117509	0.126079	-0.00513537	0.558504	-0.0100294	-0.237249	-0.0100686	0.0942249	0.0119327	0.326319	0.00118055	-0.208655	-0.00294951	-0.0646462	-0.0045955	0.00680296	-0.00190805	0.325013	-0.00766945	0.0735992	-0.00458614	-0.018678	-0.00801175	-0.242196	-0.0116214	0.0829208	-0.0124195	0.289099	-0.00356552	-0.0303294	-3.97312e-05	-0.317073	-1.4337e-05	0.107066	-4.321e-05	-0.754407	0.0630975	-0.747112	-0.00762066	0.022599	-5.04491e-05	0.263948	-1.91103e-05	0.3455	0.000290099
-0.0668179	-0.00369421	-0.714203	-0.00501341	-0.013506	-0.00235093	0.0598317	-0.00509659	0.479342	-0.0078309	-0.459039	-0.00918492	-0.0468085	0.0137949	0.100112	0.00324591	0.00470588	-0.0039758	-0.0524278	-0.00447631	0.0749325	-0.00291979	0.234345	-0.00474239	0.120781	-0.00493894	0.00553656	-0.00925038	-0.270263	-0.0113669	-0.23627	-0.0124195	0.202495	-0.00369421	-0.127945	-2.43358e-05	-0.181572	-2.05704e-05	0.442385	-4.27427e-05	-0.787234	0.10061	-0.756839	-0.0067734	0.0808526	-5.06638e-05	0.273543	-9.78822e-06	0.924538	9.33964e-05
-0.22945	-0.000279009	-0.435555	-0.00340471			0.0940426	-0.00509659	0.378676	-0.00687532			0.310638	0.00857928	-0.141769	0.0050156	-0.575438	-0.0043607	-0.0330262	-0.0041946	0.0699855	-0.00132231	0.281057	-0.00286155	0.0970085	-0.00482134	0.0419389	-0.00579595	-0.284757	-0.0105081	-0.190388	-0.0119883	0.0518708	-0.00323308	0.0017581	4.80906e-06	-0.439024	-1.55836e-05	-0.0437089	-4.23922e-05	-0.790426	0.106837	-0.75076	-0.00592627	0.0808526	-5.06638e-05	0.182689	-1.80227e-05	0.490995	0.000125486
-0.26144	-0.00111621	-0.510688	-0.00183623			0.133894	-0.00512244	0.989619	-0.00773534			-0.204005	0.00671535	-0.0181444	0.0020658	-0.269926	-0.00391165	-0.0408154	-0.00388039	0.0538473	-0.000825328	0.0304494	-0.00160801	0.123769	-0.00505654	0.0665896	-0.00566564	-0.293754	-0.0103385	-0.18199	-0.0125632	0.105645	-0.00123851			-0.485929	-1.87004e-05	0.0534827	-4.16913e-05	-0.744681	0.11927	-0.73617	-0.0042324	0.161122	-5.05207e-05	-0.000913756	-2.08194e-05	0.330107	5.90854e-05
-0.433721	0.00287187	-0.528154	-0.000723114			0.0842748	-0.00513537	0.787525	-0.00792647			-0.194326	0.00298561	0.0675645	0.00619508	-0.526552	-0.00141044	0.0851158	-0.00338199	-0.00904812	-0.00101169	-0.0313736	-0.00160801	0.112007	-0.00470374	0.117637	0.00396898	-0.317661	-0.00996739	-0.263051	-0.0115571	-0.00405491	0.000327045			-0.538462	-9.97353e-06	-0.128418	-4.05231e-05	0.140426	0.0316395	-0.772644	-0.00338566	0.161122	-5.05207e-05	0.187739	-1.84889e-05	0.128383	0.000151224
-0.337374	0.00674548	-0.392283	-0.000347457			0.0228671	-0.00494149	1.10084	-0.00811761			-0.136778	0.0018662	-0.389731	0.00943733	-0.52247	-0.00217992	0.0665537	-0.00352284	0.0473659	-0.00122469	0.284507	0.000480574	0.133333	0.00599637			-0.2547	-0.0105293	-0.187945	-0.0119883	-0.0316877	-9.11443e-05			-0.146341	-2.18171e-05	0.0575716	-4.064e-05	0.114894	0.0379456	-0.729362	-0.00253905	-0.0210125	-5.03059e-05	0.309549	-2.37714e-05	0.450458	2.32165e-05
0.0500214	0.000202197	-0.385964	-0.001844			0.0919673	-0.00513537	0.926471	-0.00849991			-0.136778	0.00149301	-0.0810061	0.00648991	-0.376692	-0.00416825	-0.11299	-0.00388039	0.0232747	-0.00188142							-0.288309	-0.0118334	-0.227028	-0.0118446							0.0416951	-4.25091e-05	-0.404255	0.0253262	-0.787234	-0.00338566	-0.0210125	-5.03059e-05	0.502729	-1.94211e-05	0.332373	2.33106e-06
						0.0605924	-0.00510952	1.03431	-0.00907341			-0.25	0.00223936	0.00897868	0.0073743	-0.105789	0.00358857	-0.00197836	-0.00255856	0.044063	-0.00165067							-0.264747	-0.0118016	-0.317798	-0.00782172							0.547558	-4.01727e-05	-0.840426	0.113057	-0.768794	0.000846089	0.428525	-5.0807e-05	0.270003	-1.83335e-05	0.913533	1.35292e-05
						0.0160887	-0.00501904	1.03431	-0.00620651			-0.211348	0.00223936	0.0890961	0.00472069	-0.0803486	-0.000192311	-0.0173325	-0.000846748	0.0892982	-0.000452597							-0.261984	-0.0105611	0.241966	-0.0125632							0.0585944	-3.57336e-05	-0.361702	0	-0.739574	0.00591989	0.428525	-5.0807e-05	0.00336922	1.24295e-06	0.272672	2.60966e-05
						0.0679223	-0.00483808	0.286765	-0.00754421			-0.217021	0.0026125	0.0531506	0.000590308	-0.0773109	0.000192304	-0.0173325	-0.000164214	0.114936	0.000363848							-0.280259	-0.0101476									0.1295	-2.5804e-05	0.323877	0.0190056	-0.708936	-0.00253905	0.683548	-5.09502e-05	0.029092	4.53676e-05	0.386903	3.52828e-05
						0.079749	-0.00472175	2.03793	-0.00725753			-0.25	0.0026125	-0.001036	0.0191526	-0.0807916	-0.00320606	-0.00197836	-0.00213601	0.200423	1.77488e-05							-0.266499	-0.0111018									0.0837404	-3.05935e-05	0.165957	0	-0.782371	-0.00169257	0.683548	-5.09502e-05	-0.0446582	1.39832e-06	0.214	-8.35378e-06
						0.10069	-0.0026796	1.16176	-0.00668422			-0.281915	0.0033587	0.0219978	0.00383587	-0.050173	-0.00378335			0.0217448	0.000195236							-0.280259	-0.011685									0.00634917	-3.8654e-05	0.0723404	0.0379456			0.0866938	-5.03775e-05	0.00332251	1.67798e-05	0.60341	5.05978e-06
								1.36765	-0.00572884			-0.0703764	0.00149301	0.0740741	-0.00531563	-0.046875	-0.00217992			0.0479009	-0.00305292							-0.257767	-0.0118228									-0.0123761	-3.65513e-05	-0.0212766	0.0379456			0.0866938	-5.03775e-05	-0.0448425	-1.86442e-06	0.296185	-1.04833e-05
								-0.202128	-0.00506016							-0.0344158	-0.00333434			0.0441889	-0.00276892							-0.270321	-0.0118334									0.0712654	-3.81868e-05	-0.455319	0.0253262			0.0628351	-5.03775e-05	-0.172199	2.70341e-05
								0.982668	-0.00391406											0.0493352	-0.00277779							-0.268336	-0.0117592									0.128924	-1.64585e-05	0.0468085	0			0.0628351	-5.03775e-05	-0.144745	3.85314e-05
								0.19923	-0.010125											0.0412091	-0.00235179							-0.300252	-0.0115684									-0.0989976	-4.65977e-06	0.0638298	0.00634249			0.162583	-5.00911e-05	-0.0579268	1.32063e-05
								1.60695	-0.00601543											0.027746	-0.00211217							-0.298253	-0.011685									-0.0819571	-2.26499e-05					0.162583	-5.00911e-05
																				0.034824	-0.00201454							-0.271262	-0.0113563									0.0434574	-1.87948e-05					0.104838	-4.99479e-05
																				0.0366121	-0.00245829							-0.273213	-0.0115684									-0.110679	-2.3818e-05					0.104838	-4.99479e-05
																				0.0715557	-7.98696e-05							-0.263074	-0.0107308									-0.00842424	-2.19489e-05					0.0669789	-4.91604e-05
																				0.0533873	-0.000541342							-0.269401	-0.011844									0.0410564	-2.20658e-05					0.0669789	-4.91604e-05
																				0.122989	0							-0.265613	-0.0117062									0.384529	-1.50566e-05					0.0271209	-4.60103e-05
																				0.0908951	0.000221859							-0.265864	-0.0102537									0.0621269	-4.89341e-06					0.0271209	-4.60103e-05
																				0.045027	-0.0017838							-0.298911	-0.011685									-0.0764301	-8.04751e-07					-0.00921844	-4.7299e-05
																				-0.099656	-0.00189917							-0.27666	-0.0112185									1.18199	4.53386e-05					-0.00921844	-4.7299e-05
																				0.194334	-0.000212986							-0.376596	-0.00570556									0.0446216	7.25574e-06					0.168737	-4.64399e-05
																				0.127253	-0.00102944							0.0156871	-0.0084089									0.423266	3.23717e-05					0.168737	-4.64399e-05
																				0.0616618	-0.00195242							-0.103537	-0.00852552									0.152434	1.14612e-05					-0.0476954	-4.67978e-05
																				0.0547173	-0.00212992							0.0884608	-0.00886478									-0.0100145	-4.54295e-06					-0.0476954	-4.67978e-05
																				0.0265849	-0.00212104							0.0636003	-0.00929946									0.23836	1.2863e-05					0.140133	-2.61791e-05
																				0.0341849	-0.00218317							-0.136311	-0.00855733									0.127815	2.15076e-05					0.140133	-2.61791e-05
																				0.0436337	-0.00200567							0.0323785	-0.00783641									0.034278	3.33063e-05					0.202223	-1.07151e-05
																				0.113999	-0.00136668							0.00902151	-0.00738055															0.202223	-1.07151e-05
																				0.160349	-0.000985071							0.0186657	-0.00693529															0.265557	-1.40799e-06
																				0.20483	-0.000985071							0.0121358	-0.00709431															0.268903	-1.26481e-06
																				-0.0900255	-0.00248492							-0.0308033	-0.00675507															0.268067	-1.26481e-06
																				0.181586	-0.000851952							0.0346277	-0.00696709															0.343676	-8.56727e-06
																				0.22438	-0.00101169							0.00618203	-0.00629921															0.343676	-8.49568e-06
																				-0.331748	-0.00296417							0.0863591	-0.00683988															0.345939	-8.49568e-06
																				0.0535145	-0.0018548							-0.0918133	-0.00652184															0.456628	-1.04287e-05
																				0.120037	-0.00126906							-0.185167	-0.00629921															0.453487	-1.05003e-05
																				0.0790811	-0.00142881							0.0240433	-0.00673386															0.456628	-1.02855e-05
																				0.0833503	-0.00126019							0.017073	-0.00744415															0.291519	1.38413e-06
																				0.10816	-0.00134893							-0.0457006	-0.00744415															0.291519	1.38413e-06
																				0.114798	-0.00126019							0.105143	-0.00680807															0.374296	-1.723e-05
																				0.087049	-0.00112707							-0.0646469	-0.00608719															0.374296	-1.723e-05
																				0.10947	-0.000780955							0.0765444	-0.00568435															0.380988	-1.71584e-05
																				0.00900017	0.000576831							-0.0977533	-0.00592818
																				0.0425123	-0.000683335							0.0121358	-0.00563135
																				0.0440594	-0.00240504							0.0305382	-0.00655364
																				0.0115367	-0.00237842							0.0988903	-0.0062144
																				-0.0255067	-0.00243167							0.0193653	-0.00662785
																												-0.130754	-0.00630981
																												-0.0187429	-0.00662785
																												-0.196245	-0.00425325
																												-0.0909875	-0.00565255
																												-0.0437062	-0.00488929
																												0.0767402	-0.00449707
																												0.00148171	-0.00536633
																												-0.0296349	-0.00647943
[truncated: 18 more columns]

## Sheet: Experimental losses
Experimental lab weathering - 45 weeks
Hausrath et al. (2009). "Elemental release rates from dissolving basalt and granite with and without organic ligands." AJS
	Al2O3 (wt%)	TiO2 (wt%)	MgO (wt%)	Al % removed	Ti % removed	Mg % removed
Unweathered Columbia River basalt	13.3	2.15	3.84
Basalt after citrate weathering				0.29	0.14	2.3
Basalt after ligand-free weathering				0.0032	4.4e-05	0.61
Unweathered Yosemite granite	15.12	0.42	1.04
Granite after citrate weathering				0.28	0.35	1.6
Granite after ligand-free weathering				0.0018	0.00015	0.13

## Sheet: ANOVA
Basal Pongola		Denny Dalton		Lake Voronye		Mt. Roe #2		Black Reef		Saganaga		Lauzon Bay		Pronto		Denison		Quirke		Cooper Lake		Ville Marie		Hekpoort		Beaverlodge Lake		Flin Flon		Baraboo		Avontuur		Drakenstein		Temperance River		Sigula		Roded		Timna		Verde River		Elk Point		St. Francois Mtns
Variance:	0.0363259	Variance:	0.0248185	Variance:	0.0155363	Variance:	0.0011041	Variance:	0.280655	Variance:	0.00837831	Variance:	0.228311	Variance:	0.0225841	Variance:	0.037074	Variance:	0.0026416	Variance:	0.00722779	Variance:	0.0162764	Variance:	0.00326961	Variance:	0.00195751	Variance:	0.0233861	Variance:	0.0277131	Variance:	0.0136775	Variance:	0.00247744	Variance:	0.0206178	Variance:	0.0598574	Variance:	0.172793	Variance:	0.00147835	Variance:	0.032195	Variance:	0.0372676	Variance:	0.0547138
Average:	-0.14646	Average:	-0.56597	Average:	-0.172032	Average:	0.0767778	Average:	0.894338	Average:	-0.357626	Average:	1.38318	Average:	0.0070755	Average:	-0.214075	Average:	-0.0187986	Average:	0.0584095	Average:	0.194399	Average:	0.132197	Average:	0.0463011	Average:	-0.134834	Average:	-0.130929	Average:	0.0809633	Average:	-0.0602482	Average:	-0.367938	Average:	0.121935	Average:	-0.297865	Average:	-0.762264	Average:	0.199102	Average:	0.115972	Average:	0.421831
Variances				Anova: Single Factor
0.0363259	0.0162764	0.0214073		SUMMARY
0.0248185	0.00326961	0.144334		Groups	Count	Sum	Average	Variance
0.0155363	0.00195751	0.222893		Column 1	11	0.664657	0.0604233	0.00949245
0.0011041	0.0233861	0.202222		Column 2	15	0.695768	0.0463845	0.00434464
0.280655	0.0277131	0.0311897		Column 3	7	0.751117	0.107302	0.00808095
0.00837831	0.0136775	0.127443
0.228311	0.00247744	0.00162911
0.0225841	0.0206178			ANOVA
0.037074	0.0598574			Source of Variation	SS	df	MS	F	P-value	F crit
0.0026416	0.172793			Between Groups	0.017921	2	0.00896051	1.31621	0.283192	3.31583
0.00722779	0.00147835			Within Groups	0.204235	30	0.00680784
	0.032195
	0.0372676			Total	0.222156	32
	0.0547138
	0.228087
Averages				Anova: Single Factor
-0.14646	0.194399	-0.398949		SUMMARY
-0.56597	0.132197	-0.00589509		Groups	Count	Sum	Average	Variance
-0.172032	0.0463011	0.13866		Column 1	11	0.944821	0.0858928	0.318668
0.0767778	-0.134834	0.5266		Column 2	15	0.0203068	0.00135379	0.0976495
0.894338	-0.130929	0.0805597		Column 3	7	0.504687	0.0720981	0.0744768
-0.357626	0.0809633	0.143615
1.38318	-0.0602482	0.020097
0.0070755	-0.367938			ANOVA
-0.214075	0.121935			Source of Variation	SS	df	MS	F	P-value	F crit
-0.0187986	-0.297865			Between Groups	0.0521025	2	0.0260512	0.156288	0.856005	3.31583
0.0584095	-0.762264			Within Groups	5.00064	30	0.166688
	0.199102
	0.115972			Total	5.05274	32
	0.421831
	0.461685
[truncated: 16 more columns]

## Sheet: Paleolatitudes
	ΔAl/Ti
Paleosol	Paleolatitude	Mean	Minimum	First quartile	Median	Third quartile	Maximum
Basal Pongola	30	-0.14646	-0.433721	-0.280424	-0.148134	-0.0337882	0.168824
Denny Dalton	NA	-0.56597	-0.796313	-0.726802	-0.519421	-0.424737	-0.385964
Lake Voronye	NA	-0.172032	-0.318053	-0.251294	-0.184535	-0.0990207	-0.013506
Mt. Roe #2	49	0.0767778	0.0160887	0.0601124	0.079749	0.0940426	0.133894
Black Reef	NA	1.83697	-0.202128	0.378676	0.982668	1.16176	22.5294
Saganaga	NA	-0.357627	-0.459039	-0.417815	-0.376592	-0.30692	-0.237249
Lauzon Bay	14	-0.143937	-0.420622	-0.241755	-0.199166	-0.0869769	0.310638
Pronto	14	0.0070755	-0.389731	-0.0162458	0.0154882	0.0724467	0.326319
Denison	14	-0.214075	-0.575438	-0.323309	-0.105789	-0.063742	0.00470588
Quirke II	14	0.00313648	-0.11299	-0.0392928	-0.0173325	0.0494207	0.18856
Cooper Lake	14	0.0584095	-0.331748	0.0341849	0.0533873	0.10816	0.22438
Ville Marie	1	0.194399	-0.0313736	0.132397	0.236795	0.282782	0.325013
Hekpoort	NA	0.132197	0.0735992	0.104508	0.120781	0.128551	0.264881
Beaverlodge	7	0.0463011	-0.018678	0.0146371	0.0533606	0.0661377	0.117637
Flin Flon	NA	-0.134834	-0.527235	-0.270263	-0.130754	0.0121358	0.105143
Baraboo	60	-0.130929	-0.317798	-0.233959	-0.189166	-0.0677746	0.241966
Avontuur	26	0.0809633	-0.0466238	-0.0178713	0.0518708	0.15407	0.289099
Drakenstein	26	-0.0655387	-0.127945	-0.086701	-0.0844766	-0.0303294	0.0017581
Temperance River	26	-0.367938	-0.538462	-0.476548	-0.439024	-0.249322	-0.146341
Sigula	NA	0.121935	-0.128418	-0.00842424	0.0575716	0.1295	1.18199
Roded	NA	-0.297865	-0.840426	-0.754407	-0.361702	0.0723404	0.323877
Timna	NA	-0.762264	-0.867376	-0.775076	-0.753799	-0.738723	-0.708936
Verde River	NA	0.199102	-0.0476954	0.065943	0.161853	0.343676	0.683548
Elk Point	5	0.115972	-0.172199	-0.0446582	0.029092	0.270003	0.502729
Dunn Point	50	0.461685	-0.116678	0.0194042	0.457191	0.981201	1.15426
Boulder Creek	8	-0.398949	-0.596376	-0.499656	-0.389998	-0.366376	-0.116151
Ischigualasto	48	-0.0058951	-0.260093	-0.224015	-0.207267	0.0108525	0.651047
Bidar	28	0.13866	-0.294005	-0.221175	-0.0277441	0.249034	1.01955
Picture Gorge	45	0.5266	-0.0882923	0.0429302	0.735287	0.887595	1.21054
Lower Rice Creek	46	0.0805597	-0.0760057	-0.00852958	0.00810285	0.121639	0.539791
Lawyer Canyon	46	0.143615	-0.0316195	-0.0111866	-0.00355277	0.0229669	1.01691
Upper Shumaker	46	0.020097	-0.0145903	-0.00891793	0.00372865	0.0327436	0.0875212

## Sheet: Basal Pongola
New data from ICP-MS
Sample type	Depth (m)	Al (ppm)	Mg (ppm)	Ti (ppm)	Ca (ppm)	K (ppm)	Na (ppm)	CIA	CIA-K	Th (ppm)	Cr (ppm)	Co (ppm)	Al % change	Mg % change	Ti % change	Mg 'amplification'	Expected Al % change	Expected Ti % change	Expected Al	Expected Ti	Expected Al/Ti	Expected ΔAl/Ti	Al/Ti	Mg/Ti	Ca/Ti	Th/Ti	Cr/Ti	Cr/Th	ΔAl/Ti	ΔMg/Ti	ΔCa/Ti	ΔTh/Ti	ΔCr/Ti	ΔCr/Th
saprolite	66.67	15583.6	4406.28	486.9	2860.95	8299.67	250.732	57.7278	83.3558	2.697	30.638	20.257	444.694	-59.1341	366.019	454.878	0.81878	0.0682317	2837.55	104.409	27.1772	-0.00751061	32.0057	9.04966	5.87584	0.00553913	0.0629246	11.36	0.168824	-0.912309	-0.811696	1.67931	-0.649981	-0.869362
saprolite	90.08	11358.6	9842.97	442.095	2575.1	3268.94	84.986	65.7036	81.0247	1.083	43.142	4.984	297.018	-8.71172	323.136	67.0132	0.120624	0.010052	2857.53	104.47	27.3526	-0.00110583	25.6926	22.2644	5.82477	0.0024497	0.0975854	39.8356	-0.0617247	-0.784258	-0.813332	0.184936	-0.45718	-0.5419
saprolite	90.35	13629.9	7645.07	533.395	3638.09	5852.83	94.196	58.7116	78.5034	1.284	48.312	3.165	376.408	-29.0961	1404.73	223.816	0.402869	0.0335724	2849.45	104.446	27.2817	-0.00369421	25.5532	14.3328	6.82063	0.00240722	0.0905745	37.6262	-0.0668179	-0.861114	-0.781418	0.164389	-0.496178	-0.567308
saprolite	92.6	33172.2	10545.3	1572.15	687.768	13777.2	122.449	69.4567	97.6158	2.468	139.99	8.459	1059.47	-2.1982	1404.73	16.9092	0.0304366	0.00253638	2860.11	104.478	27.3752	-0.000279009	21.0999	6.70753	0.437469	0.00156982	0.0890434	56.722	-0.22945	-0.935004	-0.98598	-0.240667	-0.504695	-0.34771
saprolite	92.6	31519.9	9834.15	1558.55	648.469	13859.1	104.53	68.3255	97.6668	2.438	131.309	10.717	1001.72	-8.79351	1391.71	67.6424	0.121756	0.0101464	2857.49	104.47	27.3523	-0.00111621	20.2239	6.30981	0.416072	0.00156427	0.0842507	53.8593	-0.26144	-0.938858	-0.986666	-0.24335	-0.531354	-0.380631
saprolite	92.8	22327	13222.6	1439.86	1603.43	9880.31	109.584	65.8219	92.8743	3.98	183.295	8.701	680.396	22.6327	1278.11	-174.098	-0.313376	-0.0261147	2869.94	104.508	27.4615	0.00287187	15.5063	9.18325	1.1136	0.00276415	0.1273	46.054	-0.433721	-0.911014	-0.964312	0.33704	-0.29189	-0.47039
saprolite	92.8	6357.57	16516.2	350.384	3594.06	1803.55	59.418	53.8112	63.5056	1.103	43.125	6.066	122.217	53.1788	235.358	-409.068	-0.736322	-0.0613602	2882.04	104.545	27.5676	0.00674548	18.1446	47.1374	10.2575	0.00314797	0.123079	39.0979	-0.337374	-0.543238	-0.671276	0.522697	-0.31537	-0.550383
saprolite	92.8	14235.9	10954.1	495.118	803.042	4651.82	78.543	72.0101	94.1684	1.551	53.865	8.19	397.589	1.5931	373.885	-12.2546	-0.0220583	-0.00183819	2861.61	104.483	27.3884	0.000202197	28.7526	22.1242	1.62192	0.00313259	0.108792	34.7292	0.0500214	-0.785616	-0.948022	0.515253	-0.394842	-0.600622
parent	165.5	2860.98	10782.3	104.481	3260.21	13.32	27.4423	46.5492	46.7438	0.216	18.783	4.716											27.3828	103.199	31.2039	0.00206737	0.179775	86.9583
																												Variance:	0.0363259
																												Average:	-0.14646

## Sheet: Denny Dalton
New data from ICP-MS
Sample type	Depth (m)	Al (ppm)	Mg (ppm)	Ti (ppm)	Ca (ppm)	K (ppm)	Na (ppm)	CIA	CIA-K	Th (ppm)	Cr (ppm)	Co (ppm)	Al % change	Mg % change	Ti % change	Mg 'amplification'	Expected Al % change	Expected Ti % change	Expected Al	Expected Ti	Expected Al/Ti	Expected ΔAl/Ti	Al/Ti	Mg/Ti	Ca/Ti	Th/Ti	Cr/Ti	Cr/Th	ΔAl/Ti	ΔMg/Ti	ΔCa/Ti	ΔTh/Ti	ΔCr/Ti	ΔCr/Th
sericite zone	227.95	54630.2	480.158	4490.2	330.697	32997.4	953.166	61.4433	97.7039	1.965	80.979	17.485	53.2141	-97.0123	550.869	159.037	0.508917	0.00699761	35474.7	689.83	51.4252	-0.00501955	12.1665	0.106935	0.0736486	0.00043762	0.0180346	41.2107	-0.764601	-0.99541	-0.996398	-0.738837	-0.654944	0.321229
sericite zone	227.65	55874	567.078	5307.43	598.207	40718.3	1205.37	56.7849	96.873	1.277	63.399	7.869	56.7024	-96.4715	669.328	158.15	0.50608	0.0069586	35475.7	689.83	51.4267	-0.00499156	10.5275	0.106846	0.112711	0.000240606	0.0119453	49.6468	-0.796313	-0.995414	-0.994488	-0.856411	-0.77145	0.591695
sericite zone	228.2	58683.9	499.225	3972.82	246.445	30194.7	829.764	65.2371	98.1991	2.132	52.447	31.694	64.5829	-96.8937	475.872	158.842	0.508295	0.00698905	35474.9	689.83	51.4255	-0.00501341	14.7713	0.12566	0.0620328	0.000536647	0.0132015	24.5999	-0.714203	-0.994606	-0.996966	-0.67974	-0.747417	-0.211318
chlorite zone	229.4	42737.1	5495.78	1464.95	201.016	15123.4	523.641	72.9487	98.3327	nd	46.742	nd	19.859	-65.804	112.349	107.875	0.345201	0.00474651	35533	689.845	51.5087	-0.00340471	29.1731	3.75152	0.137217	nd	0.031907	nd	-0.435555	-0.838963	-0.993289	nd	-0.389524	nd
chlorite zone	230.7	25860.2	10367.6	1022.55	588.831	971.631	38.928	94.1755	97.63	0.933	20.601	52.416	-27.4732	-35.4903	48.2221	58.1809	0.186179	0.00255996	35589.7	689.86	51.5898	-0.00183623	25.2899	10.139	0.575845	0.000912423	0.0201467	22.0804	-0.510688	-0.564777	-0.971837	-0.455484	-0.614534	-0.292095
chlorite zone	231.6	27917	13825.2	1144.74	1427.98	732.193	31.984	92.7193	95.0302	0.922	23.597	30.212	-21.705	-13.9764	65.9334	22.9121	0.0733188	0.00100813	35630	689.871	51.6473	-0.000723114	24.3872	12.0772	1.24743	0.000805424	0.0206134	25.5933	-0.528154	-0.481578	-0.938992	-0.519339	-0.605603	-0.179471
chlorite zone	232.7	31530.7	14992.1	1003.85	1851.83	2827.86	87.085	86.8675	94.2069	1.025	27.008	26.352	-11.5701	-6.71571	45.5117	11.0094	0.0352299	0.000484412	35643.6	689.875	51.6667	-0.000347457	31.4096	14.9345	1.84472	0.00102107	0.0269043	26.3493	-0.392283	-0.358923	-0.90978	-0.390648	-0.48524	-0.155233
chlorite zone	237.25	25513	10343.5	803.908	1072.21	3545.93	104.725	84.3799	95.5903	0.882	56.139	25.226	-28.447	-35.6404	16.5289	58.4268	0.186966	0.00257078	35589.4	689.86	51.5893	-0.001844	31.7362	12.8665	1.33375	0.00109714	0.0698327	63.6497	-0.385964	-0.447694	-0.93477	-0.345248	0.336107	1.04063
parent	242.25	35656.1	16071.4	689.878	14105.9	4177.24	1563.94			1.156	36.057	43.173											51.6847	23.296	20.4469	0.00167566	0.0522658	31.1912
																												Variance:	0.0248185
																												Average:	-0.56597

## Sheet: Lake Voronye
Data from Alfimova et al. (2011). "Mobility of cerium in the 2.8-2.1 Ga exogenous environments of the Baltic Shield: Data on weathering profiles and sedimentary carbonates." Lithology and Mineral Resources
Sample type	Al2O3	MgO	TiO2	CaO	K2O	Na2O	Al	Mg	Ti	Ca	K	Na	CIA	CIA-K	Al % change	Mg % change	Ti % change	Mg 'amplification'	Expected Al % change	Expected Ti % change	Expected Al	Expected Ti	Expected Al/Ti	Expected ΔAl/Ti	Al/Ti	Mg/Ti	Ca/Ti	ΔAl/Ti	ΔMg/Ti	ΔCa/Ti
"Clay"	14.46	1.22	0.31	2.57	2.09	4.38	3.82631	0.735704	0.185796	1.83676	0.867468	1.62467	46.9187	52.5034	-15.4386	12.963	24	-99.7151	-0.179487	-0.0149573	4.53301	0.149858	30.2488	0.00164505	20.5942	3.95974	9.88588	-0.318053	-0.0890084	4.18145
"Residue"	15.06	1.18	0.27	2.45	4.22	1.47	3.98508	0.711582	0.161822	1.75099	1.75154	0.545266	49.6096	63.4432	-11.9298	9.25926	8	-71.2251	-0.128205	-0.0106838	4.53069	0.149851	30.2346	0.00117509	24.6263	4.39731	10.8205	-0.184535	0.0116598	4.6713
"Residue"	14.17	0.88	0.21	2.88	1.84	4.58	3.74957	0.530672	0.125862	2.05831	0.763704	1.69885	45.337	49.9494	-17.1345	-18.5185	-16	142.45	0.25641	0.0213675	4.51329	0.149803	30.1281	-0.00235093	29.7912	4.21631	16.3537	-0.013506	-0.0299824	7.57143
Parent	17.1	1.08	0.25	0.4	5.14	0.89	4.52489	0.651279	0.149835	0.285876	2.13339	0.330127													30.1991	4.34663	1.90794
																											Variance:	0.0155363
																											Average:	-0.172032

## Sheet: Mt. Roe #2
Data from Macfarlane et al. (1994). "Geology and major and trace element chemistry of late Archean weathering profiles in the Fortescue Group, Western Australia: implications for atmospheric PO2." Precambrian Research
Sample ID	Sample type	Depth (m)	Al2O3 (wt%)	MgO (wt%)	TiO2 (wt%)	CaO (wt%)	K2O (wt%)	Na2O (wt%)	Al (wt%)	Mg (wt%)	Ti (wt%)	Ca (wt%)	K (wt%)	Na (wt%)	CIA	CIA-K	Zr (ppm)	Th (ppm)	Rb (ppm)	Cr (ppm)	Zr (wt%)	Th (wt%)	Cr (wt%)	Al % change	Mg % change	Ti % change	Mg 'amplification'	Expected Al % change	Expected Ti % change	Expected Al	Expected Ti	Expected Al/Ti	Expected ΔAl/Ti	Al/Ti	Mg/Ti	Ca/Ti	Zr/Ti	Th/Ti	Cr/Ti	Cr/Th	ΔAl/Ti	ΔMg/Ti	ΔCa/Ti	ΔZr/Ti	ΔTh/Ti	ΔCr/Ti	ΔCr/Th
90MH211	sericite zone	0.02	37.77	0.07	3.32	0.03	9.82	0.46	9.99445	0.0422125	1.98981	0.0214407	4.07585	0.170627	70.0757	98.1145	885	18	242	485	0.0885	0.0018	0.0485	153.207	-98.2515	138.849	161.068	0.515417	0.00708699	3.92681	0.833026	4.71391	-0.00508367	5.02281	0.0212143	0.0107752	0.0444765	0.000904607	0.0243741	26.9444	0.0601124	-0.992679	-0.997548	0.0834126	0.113716	0.134398	0.0185702
90MH212	sericite zone	0.07	37.22	0.03	3.08	0.02	9.72	0.42	9.84892	0.0180911	1.84597	0.0142938	4.03435	0.15579	70.0824	98.3024	829	17	217	478	0.0829	0.0017	0.0478	149.52	-99.2506	121.583	162.706	0.520659	0.00715906	3.9266	0.833025	4.71367	-0.00513537	5.33536	0.0098003	0.00774325	0.0449086	0.000920924	0.0258942	28.1176	0.126079	-0.996618	-0.998238	0.0939375	0.133805	0.205144	0.0629204
90MH214	sericite zone	0.17	37.76	0.06	3.32	0.2	9.88	0.49	9.99181	0.0361822	1.98981	0.142938	4.10076	0.181755	69.3045	96.8527	870	18	245	488	0.087	0.0018	0.0488	153.14	-98.5012	138.849	161.477	0.516728	0.00710501	3.92676	0.833025	4.71385	-0.00509659	5.02148	0.0181837	0.071835	0.0437227	0.000904607	0.0245249	27.1111	0.0598317	-0.993725	-0.983656	0.0650497	0.113716	0.141415	0.0248707
90MH215	sericite zone	0.31	37.57	0.06	3.2	0.46	9.83	0.48	9.94153	0.0361822	1.91789	0.328758	4.08	0.178046	68.4286	95.1494	837	18	239	448	0.0837	0.0018	0.0448	151.866	-98.5012	130.216	161.477	0.516728	0.00710501	3.92676	0.833025	4.71385	-0.00509659	5.18357	0.0188656	0.171416	0.0436417	0.00093853	0.023359	24.8889	0.0940426	-0.99349	-0.961	0.0630757	0.15548	0.0871508	-0.0591351
90MH216	sericite zone	0.4	37.6	0.04	3.09	0.01	9.78	0.67	9.94947	0.0241214	1.85196	0.00714691	4.05925	0.248522	69.7504	97.4947	817	17	245	461	0.0817	0.0017	0.0461	152.067	-99.0008	122.302	162.296	0.519349	0.00714104	3.92665	0.833025	4.71373	-0.00512244	5.37239	0.0130248	0.00385909	0.0441153	0.000917944	0.0248925	27.1176	0.133894	-0.995505	-0.999122	0.0746134	0.130135	0.158522	0.0251178
90MH217	sericite zone	0.53	37.7	0.03	3.24	0.04	9.49	0.76	9.97593	0.0180911	1.94187	0.0285876	3.93888	0.281906	70.128	96.9815	872	20	221	477	0.0872	0.002	0.0477	152.737	-99.2506	133.094	162.706	0.520659	0.00715906	3.9266	0.833025	4.71367	-0.00513537	5.13729	0.00931634	0.0147217	0.0449053	0.00102994	0.024564	23.85	0.0842748	-0.996785	-0.996651	0.093856	0.268017	0.143234	-0.0984078
90MH218	sericite zone	1.1	37.87	0.18	3.45	0.02	10.55	0.44	10.0209	0.108546	2.06773	0.0142938	4.37884	0.163209	68.7435	98.2595	921		227	479	0.0921		0.0479	153.877	-95.5037	148.201	156.564	0.501003	0.00688879	3.92738	0.833027	4.71458	-0.00494149	4.84634	0.0524955	0.00691281	0.0445416	nd	0.0231655	nd	0.0228671	-0.981885	-0.998427	0.0849987	nd	0.0781475	nd
90MH220	sericite zone	1.9	37.03	0.03	3.16	0.44	9.7	0.58	9.79864	0.0180911	1.89392	0.314464	4.02605	0.215139	68.2628	94.8723	865	18	237	479	0.0865	0.0018	0.0479	148.246	-99.2506	127.338	162.706	0.520659	0.00715906	3.9266	0.833025	4.71367	-0.00513537	5.17374	0.00955219	0.166039	0.0456725	0.00095041	0.0252915	26.6111	0.0919673	-0.996704	-0.962223	0.112545	0.170107	0.177091	0.00596938
90MH221	sericite zone	2.34	38.47	0.05	3.38	0.07	10.16	0.45	10.1797	0.0301518	2.02577	0.0500284	4.21697	0.166918	69.659	97.9133	902	17	226	485	0.0902	0.0017	0.0485	157.899	-98.751	143.165	161.887	0.518038	0.00712303	3.9267	0.833025	4.71379	-0.00510952	5.02508	0.0148841	0.0246959	0.0445262	0.000839185	0.0239415	28.5294	0.0605924	-0.994864	-0.994381	0.0846223	0.0331711	0.114261	0.0784861
90MH224	sericite zone	2.9	37.51	0.12	3.44	0.47	10.08	0.46	9.92566	0.0723643	2.06173	0.335905	4.18377	0.170627	67.9097	95.1445	912	19	236	472	0.0912	0.0019	0.0472	151.464	-97.0025	147.482	159.02	0.508866	0.0069969	3.92707	0.833026	4.71422	-0.00501904	4.81423	0.0350988	0.162923	0.0442346	0.000921554	0.0228933	24.8421	0.0160887	-0.987888	-0.962932	0.0775194	0.13458	0.0654801	-0.0609037
90MH225	sericite zone	4.6	36.1	0.26	3.15	0.64	10.1	0.31	9.55255	0.156789	1.88793	0.457402	4.19207	0.114988	66.7217	94.3467		17	238	nd		0.0017	nd	142.011	-93.5054	126.619	153.288	0.49052	0.00674465	3.92779	0.833028	4.71507	-0.00483808	5.05981	0.0830485	0.242278	nd	0.000900459	nd	nd	0.0679223	-0.971341	-0.944877	nd	0.108609	nd	nd
90MH226	sericite zone	5.9	27.23	0.35	2.35	0.96	8	0.2	7.20543	0.211063	1.40845	0.686103	3.32045	0.0741858	63.843	90.4555	629	13	198	344	0.0629	0.0013	0.0344	82.5475	-91.2573	69.0647	149.602	0.478727	0.00658249	3.92826	0.83303	4.71563	-0.00472175	5.11585	0.149854	0.487133	0.0446589	0.000922999	0.024424	26.4615	0.079749	-0.948288	-0.889168	0.0878562	0.136359	0.136717	0.000315141
90MH227	chlorite zone	6.6	13.82	1.93	1.17	0.3	0.58	0.17	3.65696	1.16386	0.701229	0.214407	0.240733	0.0630579	87.5885	92.9478	269	6	13	170	0.0269	0.0006	0.017	-7.35196	-51.7902	-15.8273	84.9019	0.271686	0.00373568	3.93643	0.833053	4.7253	-0.0026796	5.21507	1.65974	0.305759	0.0383612	0.00085564	0.0242431	28.3333	0.10069	-0.427251	-0.930434	-0.0655521	0.0534293	0.128301	0.0710739
90MH228	parent	7.6	14.9167	4.00333	1.39	5.12333	1.75	1.34333	3.94715	2.41415	0.833085	3.6616	0.726348	0.498281			342	6.76667	28	179	0.0342	0.000676667	0.0179											4.738	2.89785	4.39523	0.0410523	0.000812242	0.0214864	26.4532
																																								Variance:	0.0011041
																																								Average:	0.0767778

## Sheet: Black Reef
Data from Maynard et al. (1995). "A paleosol developed on hydrothermally altered granite from the hinterland of the Witwatersrand Basin: Characteristics of a source of basin fill." The Journal of Geology
Sample ID	Sample type	Depth (m)	Al2O3	MgO	TiO2	CaO	K2O	Na2O	Al	Mg	Ti	Ca	K	Na	CIA	CIA-K	Zr (ppm)	Th (ppm)	Rb (ppm)	Cr (ppm)	Zr (wt%)	Th (wt%)	Cr (wt%)	Al % change	Mg % change	Ti % change	Mg 'amplification'	Expected Al % change	Expected Ti % change	Expected Al	Expected Ti	Expected Al/Ti	Expected ΔAl/Ti	Al/Ti	Mg/Ti	Ca/Ti	Zr/Ti	Th/Ti	Cr/Ti	Cr/Th	ΔAl/Ti	ΔMg/Ti	ΔCa/Ti	ΔZr/Ti	ΔTh/Ti	ΔCr/Ti	ΔCr/Th
W1	bleached	0.03	22.3	0.44	0.85	0.2	6.17	0.1	5.90088	0.265336	0.50944	0.142938	2.5609	0.0370929	68.2829	97.0394	500	10.2	170	6	0.05	0.00102	0.0006	63.9706	-66.9173	70	514.748	0.926547	0.0772123	3.5654	0.299439	11.9069	-0.00849991	11.5831	0.520838	0.280579	0.0981469	0.0020022	0.00117776	0.588235	-0.0354671	-0.805396	-0.878714	1.10084	-0.333333	-0.117647	0.323529
C1	bleached	0.04	24.9	0.31	0.93	0.22	7.35	0.04	6.58888	0.186941	0.557387	0.157232	3.05066	0.0148372	67.1539	97.455	890		230	5	0.089	nd	0.0005	83.0882	-76.6917	86	589.936	1.06189	0.0884905	3.56053	0.299406	11.892	-0.00974257	11.821	0.335388	0.282087	0.159673	nd	0.000897042	nd	-0.0156546	-0.874687	-0.878062	2.41782	nd	-0.327957	nd
W2	bleached	0.09	16.1	0.31	0.25	0.02	4.5	0.1	4.26028	0.186941	0.149835	0.0142938	1.86775	0.0370929	68.943	98.8082	160	11	150	3	0.016	0.0011	0.0003	18.3824	-76.6917	-50	589.936	1.06189	0.0884905	3.56053	0.299406	11.892	-0.00974257	28.4331	1.24764	0.0953968	0.106784	0.00734139	0.0020022	0.272727	1.36765	-0.533835	-0.958763	1.28571	1.44444	0.5	-0.386364
W3	bleached	0.12	12.8	0.33	0.02	0.02	3.68	0.1	3.38705	0.199002	0.0119868	0.0142938	1.52741	0.0370929	68.207	98.5055	99	8.87	120	3	0.0099	0.000887	0.0003	-5.88235	-75.188	-96	578.369	1.04106	0.0867553	3.56128	0.299411	11.8943	-0.00955137	282.565	16.6017	1.19246	0.825907	0.0739979	0.0250275	0.338219	22.5294	5.20301	-0.484536	16.6786	23.6389	17.75	-0.239008
C2	bleached	0.15	9.75	0.28	0.23	0.1	3.83	0.04	2.57998	0.16885	0.137849	0.0714691	1.58967	0.0148372	60.6205	96.7631	130		170	2	0.013	nd	0.0002	-28.3088	-78.9474	-54	607.287	1.09312	0.0910931	3.55941	0.299398	11.8886	-0.0100294	18.7161	1.2249	0.518461	0.0943064	nd	0.00145087	nd	0.558504	-0.542334	-0.775885	1.01863	nd	0.0869565	nd
W4	bleached	0.58	16.9	0.51	0.42	0.05	5.11	0.1	4.47197	0.307548	0.251723	0.0357345	2.12094	0.0370929	67.0889	98.3976	210	18.9	220	5	0.021	0.00189	0.0005	24.2647	-61.6541	-16	474.263	0.853673	0.0711394	3.56802	0.299458	11.915	-0.0078309	17.7654	1.22177	0.14196	0.0834249	0.00750824	0.00198631	0.26455	0.479342	-0.543502	-0.938635	0.785714	1.5	0.488095	-0.404762
C3	bleached	0.75	15	0.61	0.4	0.09	5.2	0.03	3.9692	0.367852	0.239737	0.0643222	2.15829	0.0111279	63.989	98.1346	220		240	9	0.022	nd	0.0009	10.2941	-54.1353	-20	416.426	0.749566	0.0624639	3.57177	0.299484	11.9264	-0.00687532	16.5565	1.5344	0.268304	0.0917674	nd	0.00375412	nd	0.378676	-0.426692	-0.884021	0.964286	nd	1.8125	nd
W5	bleached	0.88	18.4	0.52	0.34	0.01	5.89	0.1	4.86889	0.313579	0.203776	0.00714691	2.44468	0.0370929	66.1731	99.0996	130	10.5	200	3	0.013	0.00105	0.0003	35.2941	-60.9023	-32	468.479	0.843262	0.0702718	3.5684	0.29946	11.9161	-0.00773534	23.8933	1.53884	0.0350724	0.0637955	0.00515271	0.0014722	0.285714	0.989619	-0.425033	-0.984839	0.365546	0.715686	0.102941	-0.357143
C4	regolith	1	14.1	0.5	0.29	0.01	5.6	0.05	3.73105	0.301518	0.173809	0.00714691	2.32432	0.0185464	61.3553	99.3161	150		220	6	0.015	nd	0.0006	3.67647	-62.406	-42	480.046	0.864083	0.0720069	3.56765	0.299455	11.9138	-0.00792647	21.4664	1.73477	0.0411193	0.0863016	nd	0.00345207	nd	0.787525	-0.351828	-0.982225	0.847291	nd	1.58621	nd
W6	regolith	1.19	16	0.48	0.28	0.01	5.87	0.1	4.23382	0.289457	0.167816	0.00714691	2.43638	0.0370929	63.0554	98.9659	79	11.6	190	2	0.0079	0.00116	0.0002	17.6471	-63.9098	-44	491.614	0.884905	0.073742	3.5669	0.29945	11.9115	-0.00811761	25.229	1.72485	0.0425879	0.0470755	0.00691235	0.00119178	0.172414	1.10084	-0.355532	-0.981591	0.00765306	1.30159	-0.107143	-0.612069
C5	regolith	1.25	13.1	0.44	0.25	0.07	5.88	0.05	3.46644	0.265336	0.149835	0.0500284	2.44053	0.0185464	58.0104	98.0601	110		210	4	0.011	nd	0.0004	-3.67647	-66.9173	-50	514.748	0.926547	0.0772123	3.5654	0.299439	11.9069	-0.00849991	23.135	1.77085	0.333889	0.0734139	nd	0.0026696	nd	0.926471	-0.338346	-0.85567	0.571429	nd	1	nd
W7	regolith	1.28	16.6	0.38	0.3	0.01	6.46	0.1	4.39259	0.229154	0.179802	0.00714691	2.68126	0.0370929	61.7102	99.0029	120	12.9	210	3	0.012	0.00129	0.0003	22.0588	-71.4286	-40	549.451	0.989011	0.0824176	3.56315	0.299424	11.9	-0.00907341	24.4301	1.27447	0.0397487	0.0667399	0.00717454	0.0016685	0.232558	1.03431	-0.52381	-0.982818	0.428571	1.38889	0.25	-0.476744
W8	regolith	2.99	16.6	0.68	0.3	0.23	6.37	0.1	4.39259	0.410064	0.179802	0.164379	2.64391	0.0370929	60.6881	95.6145	95	4.09	91	6	0.0095	0.000409	0.0006	22.0588	-48.8722	-40	375.94	0.676692	0.056391	3.57439	0.299502	11.9345	-0.00620651	24.4301	2.28064	0.914219	0.0528358	0.00227472	0.003337	1.46699	1.03431	-0.14787	-0.604811	0.130952	-0.242593	1.5	2.30073
C6	regolith	3.3	14	0.54	0.4	0.24	6.27	0.05	3.70459	0.325639	0.239737	0.171526	2.6024	0.0185464	57.0194	95.1197	150		230	2	0.015	nd	0.0002	2.94118	-59.3985	-20	456.912	0.822441	0.0685367	3.56915	0.299465	11.9184	-0.00754421	15.4528	1.35832	0.715476	0.0625687	nd	0.000834249	nd	0.286765	-0.492481	-0.690722	0.339286	nd	-0.375	nd
W9	regolith	3.35	15.7	0.57	0.19	0.16	6.13	0.1	4.15443	0.34373	0.113875	0.114351	2.54429	0.0370929	60.6471	96.4829	110	10.7	190	5	0.011	0.00107	0.0005	15.4412	-57.1429	-62	439.56	0.791209	0.0659341	3.57027	0.299473	11.9218	-0.00725753	36.4824	3.01849	1.00418	0.0965973	0.00939628	0.00439078	0.46729	2.03793	0.12782	-0.565925	1.06767	2.12865	2.28947	0.0514019
W10	regolith	3.78	14.7	0.63	0.25	0.12	4.64	0.1	3.88982	0.379913	0.149835	0.0857629	1.92586	0.0370929	65.5013	96.9383	140	9.63	160	5	0.014	0.000963	0.0005	8.08824	-52.6316	-50	404.858	0.728745	0.0607287	3.57252	0.299489	11.9287	-0.00668422	25.9606	2.53553	0.572381	0.0934359	0.00642705	0.003337	0.519211	1.16176	-0.0526316	-0.752577	1	1.14	1.5	0.168224
W11	regolith	4.09	16.1	0.73	0.25	0.39	6.64	0.1	4.26028	0.440216	0.149835	0.278729	2.75597	0.0370929	58.1047	93.0984	120	8.98	230	5	0.012	0.000898	0.0005	18.3824	-45.1128	-50	347.021	0.624639	0.0520532	3.57627	0.299515	11.9402	-0.00572884	28.4331	2.938	1.86024	0.0800879	0.00599325	0.003337	0.556793	1.36765	0.0977444	-0.195876	0.714286	0.995556	1.5	0.252784
C7	regolith	4.2	10.2	0.8	0.47	0.14	5.78	0.05	2.69906	0.482429	0.28169	0.100057	2.39903	0.0185464	51.7389	95.7907	170		240	8	0.017	nd	0.0008	-25	-39.8496	-6	306.536	0.551764	0.0459803	3.57889	0.299533	11.9482	-0.00506016	9.58165	1.71262	0.355201	0.0603499	nd	0.00284	nd	-0.202128	-0.360102	-0.846458	0.291793	nd	1.12766	nd
W12	regolith	10.2	15.1	0.92	0.28	0.94	6.63	0.2	3.99566	0.554793	0.167816	0.671809	2.75182	0.0741858	53.3219	84.2672	130	10.2	230	5	0.013	0.00102	0.0005	11.0294	-30.8271	-44	237.131	0.426836	0.0355697	3.58338	0.299564	11.962	-0.00391406	23.8099	3.30597	4.00326	0.077466	0.0060781	0.00297946	0.490196	0.982668	0.235231	0.730486	0.658163	1.02381	1.23214	0.102941
C8	regolith	10.4	13.7	0.27	0.42	0.88	6.42	0.14	3.62521	0.16282	0.251723	0.628928	2.66466	0.0519301	52.0062	84.1884	120		230	3	0.012	nd	0.0003	0.735294	-79.6992	-16	613.071	1.10353	0.0919607	3.55903	0.299395	11.8874	-0.010125	14.4015	0.64682	2.49849	0.0476714	nd	0.00119178	nd	0.19923	-0.758324	0.0800196	0.0204082	nd	-0.107143	nd
W13	regolith	12	15.6	0.7	0.22	0.31	7.22	0.1	4.12797	0.422125	0.131855	0.221554	2.99671	0.0370929	55.9094	94.1037	91	10.2	270	3	0.0091	0.00102	0.0003	14.7059	-47.3684	-56	364.372	0.65587	0.0546559	3.57514	0.299507	11.9368	-0.00601543	31.3069	3.20143	1.68028	0.0690151	0.00773576	0.00227522	0.294118	1.60695	0.196172	-0.273664	0.477273	1.57576	0.704545	-0.338235
W14	parent	18.7	13.6	1.33	0.5	0.97	4.21	2.7	3.59874	0.802038	0.299671	0.69325	1.74739	1.00151			140	9	160	4	0.014	0.0009	0.0004											12.009	2.6764	2.31337	0.0467179	0.0030033	0.0013348	0.444444
																																								Variance:	0.280655
																																								Average:	0.894338

[truncated: 33 more sheets: Saganaga, Lauzon Bay XRF, Lauzon Bay ICP-MS, Pronto, Denison (S-62), Quirke (DH-268), Cooper Lake, Ville Marie, Hekpoort, Beaverlodge Lake, Flin Flon, Baraboo, Avontuur, Drakenstein, Temperance River, Sigula (F124), Roded, Timna, Verde River, Elk Point …]
